# Supplementary material for: Excited-state hydrogen relay along a blended-alcohol chain as a model system of a proton wire: deuterium effect on the reaction dynamics
Source: Royal Society of Chemistry journal article supplement (doi:10.1039/c2cp23615j), 2011-12-21
Supplement: c2cp23615j.pdf [file c2cp23615j.pdf]

## **Electronic Supplementary Information**

### **Excited-state hydrogen relay along a blended-alcohol chain as a model system of a proton wire: deuterium effect on the reaction dynamics**

Sun-Young Park and Du-Jeon Jang\*

*School of Chemistry, Seoul National University, NS60, Seoul 151-742, Korea*

**Table S1** List of abbreviations

| Symbol               | Word                                          | Symbol                 | Word                                |
|----------------------|-----------------------------------------------|------------------------|-------------------------------------|
| 7HQ                  | 7-Hydroxyquinoline                            | ESPT                   | Excited-state proton transfer       |
| 7DQ                  | Deuterated 7HQ                                | ESDT                   | Excited-state deuteron transfer     |
| ROH                  | Normal alcohol                                | H bond                 | Hydrogen bond                       |
| ROD <sup>a</sup>     | Deuterated alcohol                            | <i>K</i>               | Association constant                |
| <b>N</b>             | Normal species of 7DQ                         | $\alpha$               | Proton-donating ability (acidity)   |
| <b>T</b>             | Tautomeric species of 7DQ                     | $\beta$                | Proton-accepting ability (basicity) |
| <b>Nc</b>            | Cyclic 7DQ·(ROD) <sub>2</sub> complex         | <i>k</i> <sub>PT</sub> | Rate constant of ESPT               |
| <b>S<sup>b</sup></b> | Relatively strong-acidic alcohol in <b>Nc</b> | <i>k</i> <sub>DT</sub> | Rate constant of ESDT               |
| <b>W<sup>b</sup></b> | Relatively weak-acidic alcohol in <b>Nc</b>   | KIE <sup>c</sup>       | Kinetic isotope effect              |

<sup>a</sup> MeOD, EtOD, and BuOD are symbols for deuterated methanol, ethanol, and *tert*-butanol, respectively.

<sup>b</sup> In a blended alcohol chain. <sup>c</sup> Calculated as *k*<sub>PT</sub>/*k*<sub>DT</sub>.

**Table S2** Alcohol-dependent  $K$  and  $k_{\text{DT}}$  in  $n$ -heptane

| Alcohol              | $\alpha^a$ | $\beta^a$ | $K/\text{M}^{-2}$                     | $k_{\text{DT}}^{-1}/\text{ps}$ | $\text{KIE}^b$ |
|----------------------|------------|-----------|---------------------------------------|--------------------------------|----------------|
| Methanol             | 0.93       | 0.62      | 8400 <sup>c</sup> (9100) <sup>d</sup> | 430                            | 6.8            |
| Ethanol              | 0.83       | 0.77      | 5200 (6800)                           | 560                            | 7.8            |
| <i>tert</i> -Butanol | 0.68       | 1.01      | 3400 (4200)                           | 920                            | 5.6            |

<sup>a</sup> Proton-donating ( $\alpha$ ) and -accepting abilities ( $\beta$ ), which signify the acidity and the basicity, respectively, of ROH because the values of ROD are not available in literatures.<sup>46–48</sup> <sup>b</sup> Kinetic isotope effect calculated as  $k_{\text{PT}}/k_{\text{DT}}$ .<sup>34</sup> <sup>c</sup> For 7DQ·(ROD)<sub>2</sub>.<sup>33</sup> <sup>d</sup> For 7HQ·(ROH)<sub>2</sub>.<sup>33</sup>

**Table S3** Fluorescence kinetic constants of 7DQ in ROD-added *n*-heptane<sup>a</sup>

| Alcohol <sup>b</sup> | N* fluorescence decay               |                          | T* fluorescence          |                           |
|----------------------|-------------------------------------|--------------------------|--------------------------|---------------------------|
|                      | $\tau_{\text{fast}}^{\text{c}}$ /ps | $\tau_{\text{slow}}$ /ps | $\tau_{\text{rise}}$ /ps | $\tau_{\text{decay}}$ /ps |
| MeOD                 | 430                                 | 1800 (10%) <sup>d</sup>  | 430                      | 4900                      |
| EtOD                 | 560                                 | 1700 (13%)               | 560                      | 5300                      |
| BuOD                 | 920                                 | 1600 (13%)               | 920                      | 5000                      |

<sup>a</sup> N\* and T\* fluorescence were monitored at 420 nm and 550 nm, respectively, after excitation of Nc at 355 nm. <sup>b</sup> The concentration of each alcohol was kept at 30 mM in *n*-heptane. <sup>c</sup> ESDT time ( $k_{\text{DT}}^{-1}$ ).  
<sup>d</sup> Initial amplitude percentage of the slow decay component.
